# Supplementary material
Source: ML conference proceedings conference paper supplement (https://openreview.net/forum?id=noLMXTqgCp)

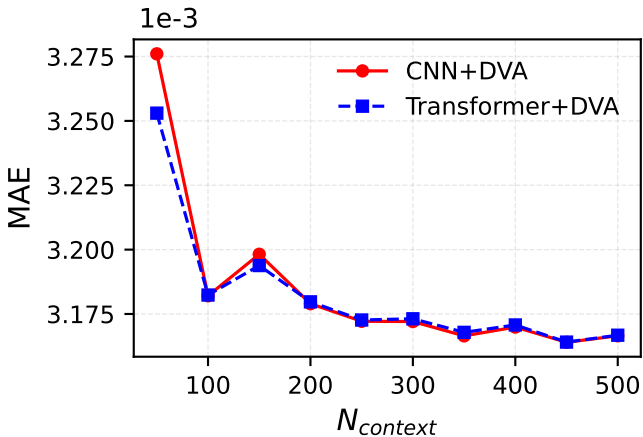

Supplement: supplementary_material [file mae_vs_context_bus32.pdf › DVA-PFN-main/64D_voltage/output_batched/plots/mae_vs_context_bus32.pdf]

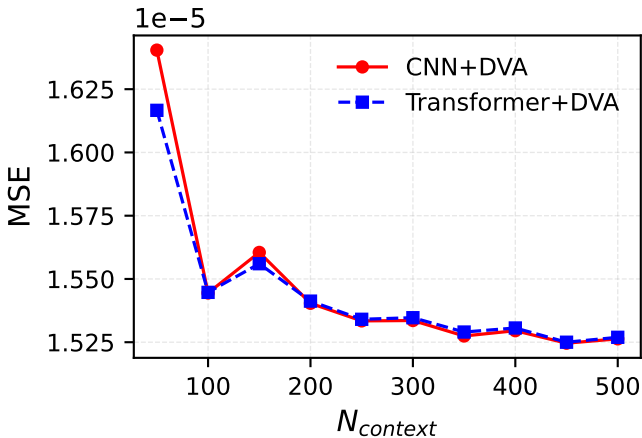

Supplement: supplementary_material [file mse_vs_context_bus32.pdf › DVA-PFN-main/64D_voltage/output_batched/plots/mse_vs_context_bus32.pdf]
